# Supplementary material for: Efficacy and safety of ultrasound-guided pulsed radiofrequency therapy of stellate ganglion on refractory painful diabetic peripheral neuropathy
Source: Research Square preprint supplement (doi:10.21203/rs.3.rs-3128530/v1), 2023-08-18
Supplement: Supplementary file 1 [file 389e4e76e5f6dc3882b0d015.xlsx]

## Sheet: Sheet1
Table 1. Outcomes
	Outcomes	Variables	Reference
	VAS	0–10	11
	SF-MPQ	0-45	12
	TCSS	0-19	13
	PDI	0-70	14
	KPS	0-100	15
	PHQ-9	0-27	16
	GAD-7	0-21	17
