# Supplementary material for: Efficacy and safety of ultrasound-guided pulsed radiofrequency therapy of stellate ganglion on refractory painful diabetic peripheral neuropathy
Source: Research Square preprint supplement (doi:10.21203/rs.3.rs-3128530/v1), 2023-08-18
Supplement: Supplementary file 2 [file 4b15a1a6516c09ec5698e380.xlsx]

## Sheet: Sheet1
Table 3. Changes in Subjective Sensation of Patients
		Time	Perceived	Perceived chills relief	Perceived
			pain relief		numbness relief
		0w	63.57±25.09	59.09±39.12	48.08±30.27
		1w	42.86±28.27*	37.27±36.54*	30.00±28.84*
		4 w	24.11±30.52*	23.18±33.86*	11.54±23.78*
		12 w	14.82±26.79*	15.91±32.90*	6.15±17.45*
		24 w	58.77	19.305*	46.136
		F	58.77	19.305	46.136
		P	<0.001	<0.001	<0.001
