# Supplementary material for: Efficacy and safety of ultrasound-guided pulsed radiofrequency therapy of stellate ganglion on refractory painful diabetic peripheral neuropathy
Source: Research Square preprint supplement (doi:10.21203/rs.3.rs-3128530/v1), 2023-08-18
Supplement: Supplementary file 3 [file 55a2ef4318a7bb60181a77a6.xlsx]

## Sheet: Sheet1
Table 2. Changes in Pain Relief, Neurological Assessment and Quality of Life
	Time	VAS	SF-MPQ	TCSS	SDN	KPS	PDI	PHQ-9	GAD-7
	0w	5.28±1.91	14.88±8.91	10.14±4.59	6.59±1.72	82.07±9.78	16.69±11.47	5.86±5.53	2.72±4.22
	1w	2.00±1.55*	5.50±5.06*	7.21±4.09*	7.04±1.47#	86.43±8.26*	11.11±9.60*	4.61±4.40#	1.86±3.35
	4w	3.41±2.06*	9.29±6.91*	8.21±4.19*	7.34±2.01#	86.07±7.86*	12.57±9.48*	4.54±4.57#	2.25±3.6
	12 w	3.93±2.16*	11.54±8.03*	9.29±4.64*	7.38±1.98#	86.07±7.86*	14.04±9.95*	4.57±4.57#	2.39±3.61
	24 w	4.39±2.18*	12.66±8.99*	9.79±4.89	7.36±1.68#	85.36±7.93*	15.68±10.13	4.71±4.29	2.68±3.63
	F	30.087	19.04	14.299	3.96	6.993	8.736	3.641	2.935
	P	<0.001	<0.001	<0.001	0.005	<0.001	<0.001	0.008	0.065
	All data values are means ± SD; # P < 0.05 compared to baseline values; * P < 0.001 compared to baseline values.
