# Supplementary material for: Efficacy and safety of ultrasound-guided pulsed radiofrequency therapy of stellate ganglion on refractory painful diabetic peripheral neuropathy
Source: Research Square preprint supplement (doi:10.21203/rs.3.rs-3128530/v1), 2023-08-18
Supplement: Supplementary file 4 [file 5bbf3d62307e5a6f5e667656.xlsx]

## Sheet: Sheet1
Table 5. Changes in effective rate
	Time	Significant effective rate	Total effective rate
	1w	38(67.86%)	50(89.29%)
	4 w	24(42.86%)	40(71.43%)
	12 w	12(21.43%)	26(46.43%)
	24 w	10(17.86%)	18(32.14%)
