# Supplementary material for: Efficacy and safety of ultrasound-guided pulsed radiofrequency therapy of stellate ganglion on refractory painful diabetic peripheral neuropathy
Source: Research Square preprint supplement (doi:10.21203/rs.3.rs-3128530/v1), 2023-08-18
Supplement: Supplementary file 5 [file 95a939231ad06818c0dc1154.xlsx]

## Sheet: Sheet1
Table 4. Changes in Medication Usage
	Time	Anticonvulsants	NASIDS
	0w	58（100%）	58（100%）
	1w	58（100%）	26*（44.83%）
	4 w	58（100%）	44*（75.82%）
	12 w	38*（65.52%）	38*（65.52%）
	24 w	42*（72.41%）	38*（65.52%）
	Z	21.636	22.69
	P	<0.001	<0.001
